# Supplementary material for: Regular hexagonal CuBi nanosheets boost highly efficient CO2reduction to HCOOH in a solid-electrolyte cell
Source: Royal Society of Chemistry journal article supplement (doi:10.1039/d2ta06843e), 2022-01-01
Supplement: d2ta06843e1.pdf [file d2ta06843e1.pdf]

## Supporting information

### **Regular Hexagonal CuBi Nanosheets Boost Highly Efficient CO<sub>2</sub> Reduction to HCOOH in Solid-Electrolyte Cell**

Xiaoshan Wang<sup>a</sup>, Xiang Fei<sup>a</sup>, Mingwang Wang<sup>a</sup>, Wenhong Wang<sup>a</sup>, Zhongxue Yang<sup>a</sup>, Hui Ning<sup>a,\*</sup>, Yunlong Zhang<sup>a</sup>, Li Wang<sup>b</sup>, Xin Jin<sup>a</sup> and Mingbo Wu<sup>a,\*</sup>

*<sup>a</sup>State Key Laboratory of Heavy Oil Processing, College of Chemical Engineering, College of New Energy, Institute of New Energy, China University of Petroleum (East China), Qingdao, 266580*

*<sup>b</sup>Shandong Dongyue future hydrogen energy material Co., Ltd, Zibo City, 256412*

*\*Corresponding author. E-mail: wumb@upc.edu.cn (M.B. Wu); ninghui@upc.edu.cn (H. Ning)*

---

## Calculation of faradaic efficiency

The faradaic efficiency of products was calculated as follows:

$$FE_{H_2 \text{ or } CO} (\%) = \frac{i_{H_2 \text{ or } CO}}{i_{Total}} \times 100\% = \frac{C_{H_2 \text{ or } CO} \times v \times \frac{2P_0F}{RT}}{i_{Total}} \times 100\%$$

$i$  (A) is partial current of the H<sub>2</sub> and CO product.

$c$  (ppm) is the volume concentrations of H<sub>2</sub> and CO analyzed by GC.

$v$  (ml min<sup>-1</sup>) is gas flow rate.

$P_0$  is the atmosphere pressure (1.013 bar).

$T$  is the temperature (298 K).

$R$  is the ideal gas constant (83.14 mL bar mol<sup>-1</sup> K<sup>-1</sup>).

$$FE_{HCOOH} (\%) = \frac{Q_{HCOOH}}{Q_{Total}} \times 100\% = \frac{C_{HCOOH} \times V \times N \times F}{Q_{Total}} \times 100\%$$

$C$  (mol L<sup>-1</sup>) is concentration of formate in the electrolyte.

$V$  (L) is the volume of the electrolyte.

$N$  is number of electrons are needed to produce one formate molecule, whose value is two.

$F$  is Faraday's constant whose value (96485 C mol<sup>-1</sup>).

$Q_{Total}$  (C) is total charge during the experiment

---

## Calculation of energy conversion efficiency

H-cell and flow-cell belong to the half cell and corresponding energy conversion efficiency (EE) was calculated in the cathode. The overpotential of oxygen evolution was assumed to be zero. The EE of formate can be calculated as follow:<sup>1</sup>

$$EE_{half-cell} = \frac{(1.23 + (-E_{foramte})) \times FE_{formate}}{(1.23 + (-E_{applied}))}$$

$E_{formate}$  is the thermodynamic potential (versus RHE) for CRR to formate, which is -0.2 for acetate.

$FE_{formate}$  is the measured faradaic efficiency of formate.

$E_{applied}$  is the applied potential (versus RHE) in three electrode system.

Formate energy efficiency reported in others' work was also calculated in full cell (MEA system):

$$EE_{full-cell} = \frac{(1.23 + (-E_{foramte})) \times FE_{formate}}{-E_{full-cell\ applied}}$$

$EE_{full-cell\ applied}$  is the full-cell potential applied in the MEA system.

## Figures and Tables

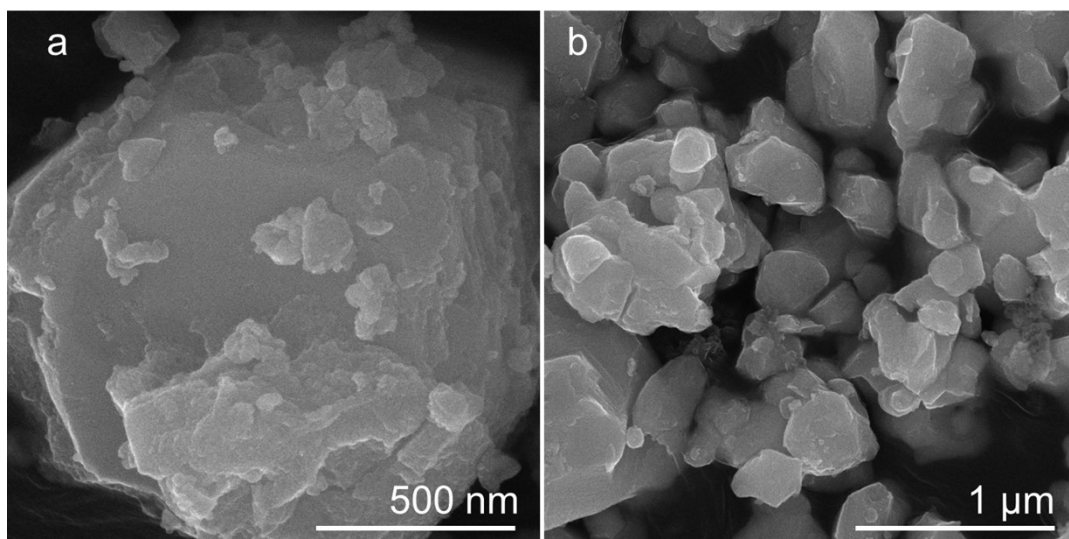

**Figure S1** SEM images of (a) BiOON<sub>4</sub> and (b) BiO<sub>x</sub>.

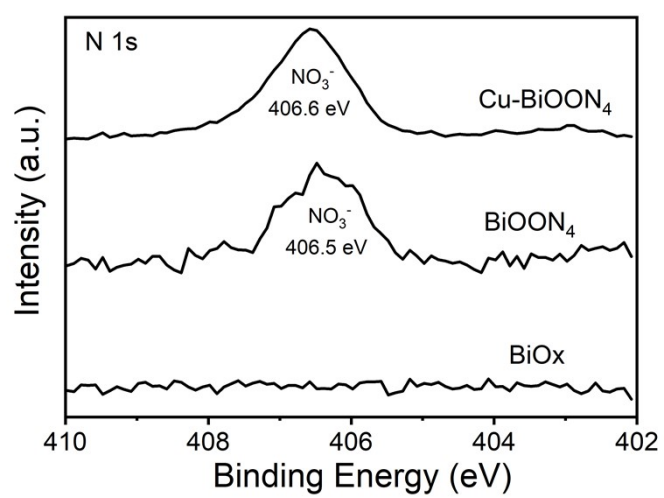

**Figure S2** High-resolution XPS of N 1s.

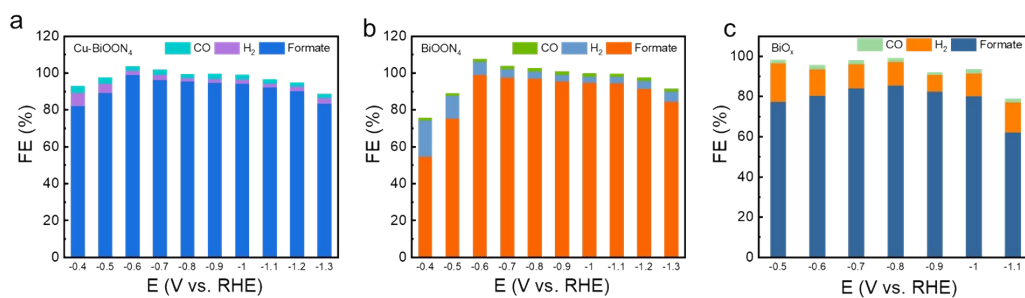

**Figure S3** Faradaic efficiencies of products in the H cell.

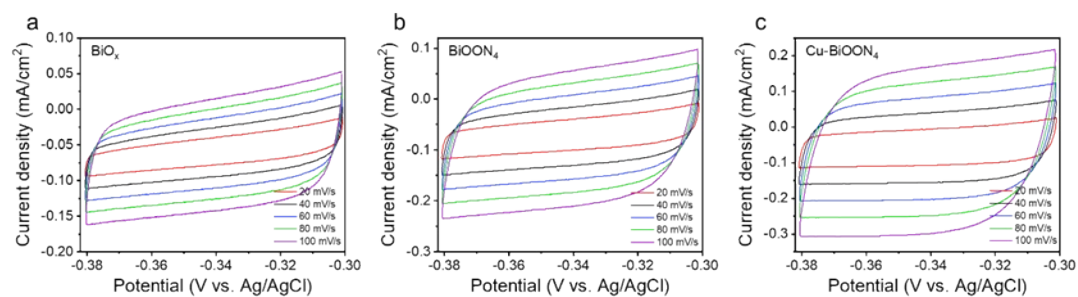

**Figure S4** CV curves for (a) BiO<sub>x</sub>, (b) BiOON<sub>4</sub> and (c) Cu-BiOON<sub>4</sub> performed in the region of -0.30 ~ -0.38 V vs. Ag/AgCl at various scan rates in 0.1 M KHCO<sub>3</sub> solution.

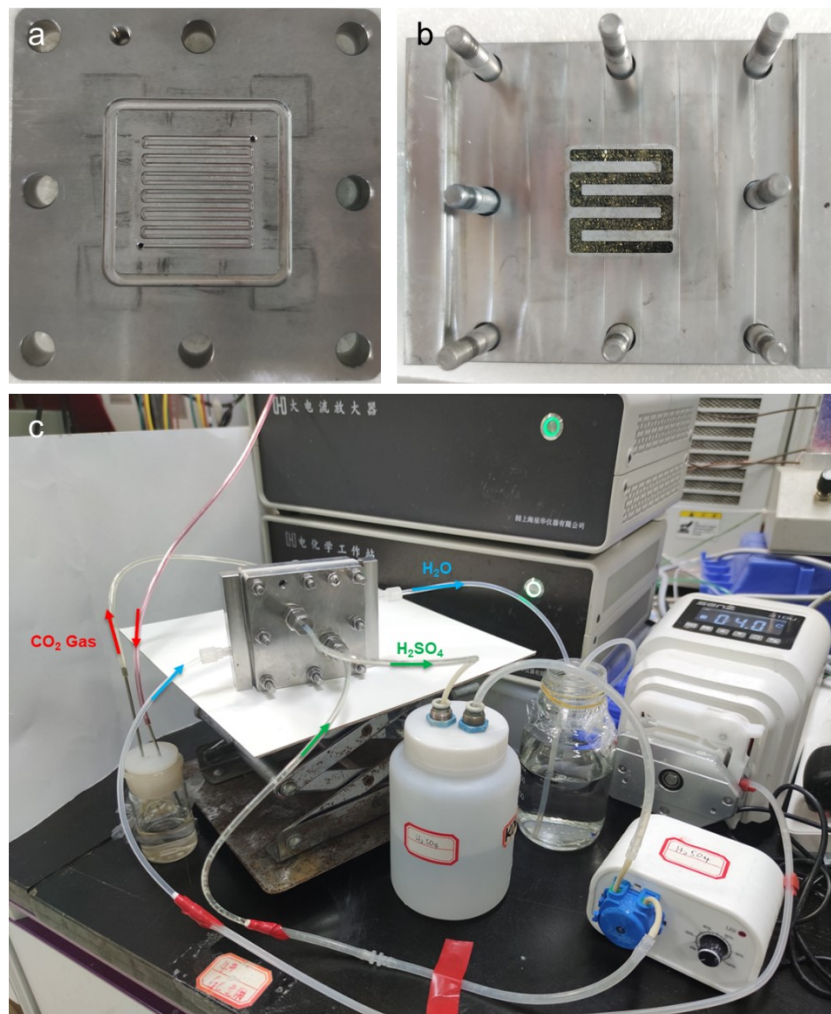

**Figure S5** The top view of (a) anode and cathode electrode. (b) The front view of the solid electrolyte layer, which contains a serpentine channel filled with styrene-divinylbenzene copolymer spheres. (c) The diagram of the working device of a solid electrolyte.

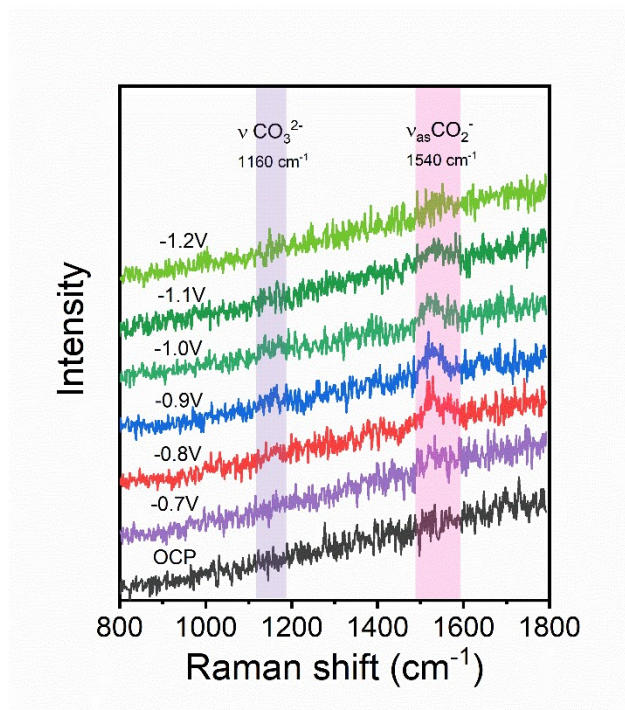

**Figure S6** Potential- dependent in situ Raman spectra in 0.1 M KHCO<sub>3</sub> electrolyte for BiOON<sub>4</sub>.

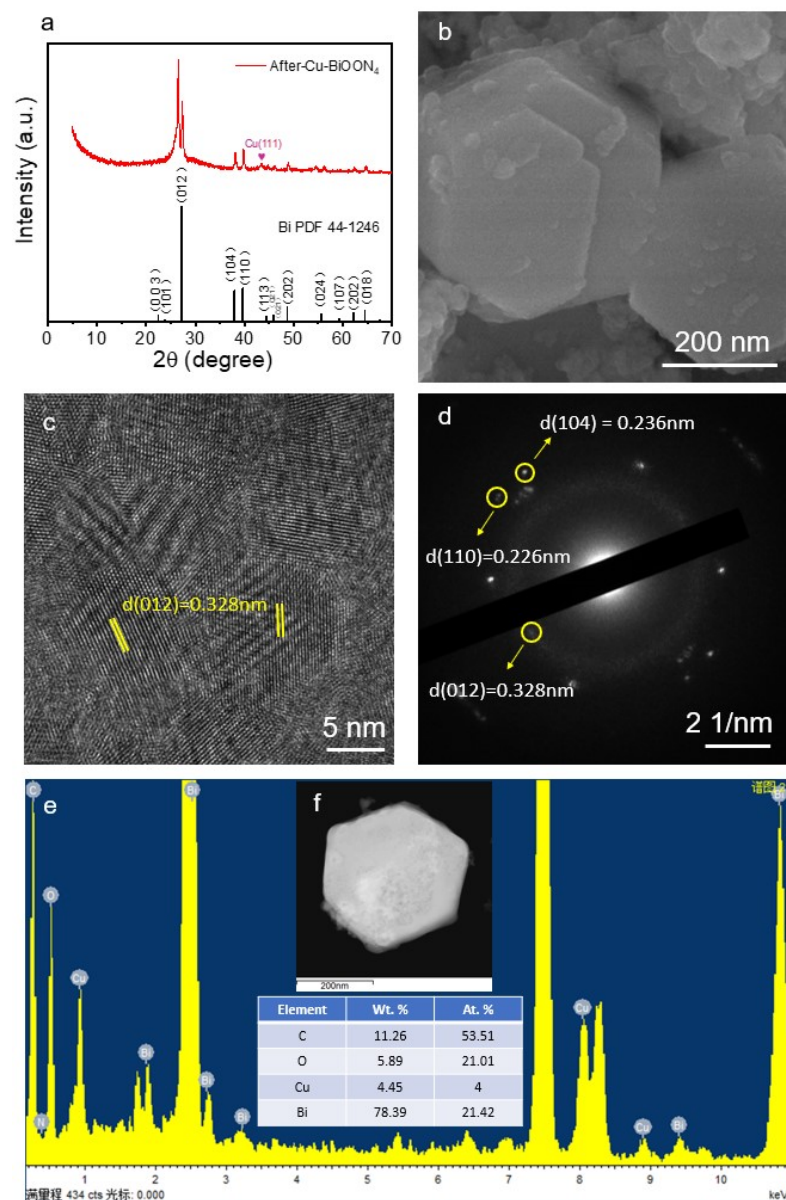

**Figure S7** (a) XRD pattern of Cu-BiOON<sub>4</sub> after 30 min reduction in CRR, noted as After-Cu-BiOON<sub>4</sub>. (b) SEM image, (c) high-resolution TEM image and (d) SAED pattern of After-Cu-BiOON<sub>4</sub>. (f) High-angle annular dark field STEM image of After-Cu-BiOON<sub>4</sub> hexagonal nanosheet and (e) corresponding EDS element analysis graph. C and O both came from absorbed HCO<sub>3</sub><sup>-</sup> species in KHCO<sub>3</sub> electrolyte.



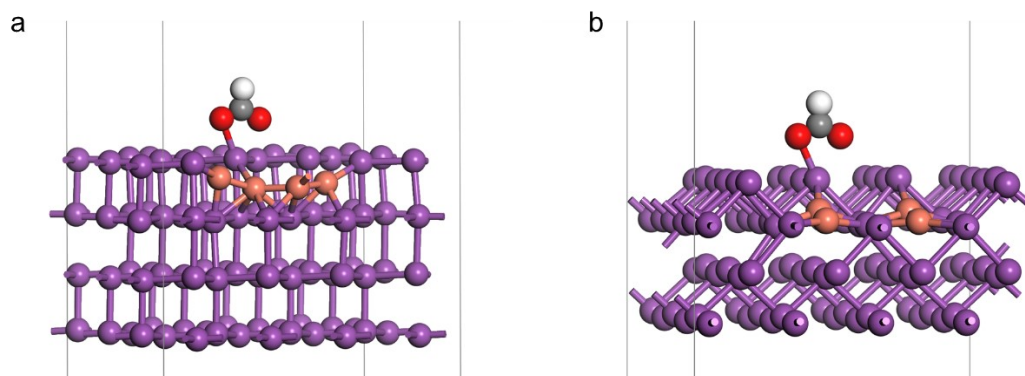

**Figure S8** The optimized adsorption models of  $*\text{OCHO}$  intermediate on (a) 4Cu-Bi(012) and (b) 4Cu-Bi(104).

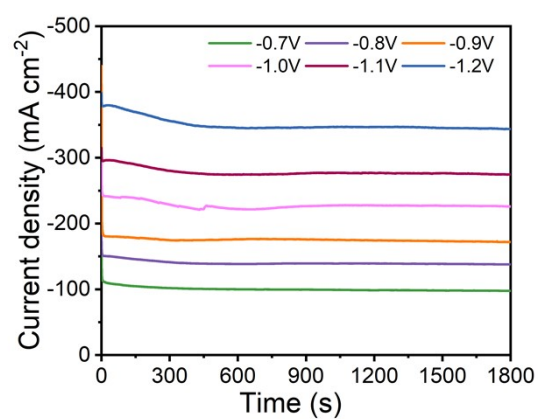

**Figure S9** Chronoamperometric responses at different potentials with 1 M KOH electrolytes in the flow cell.

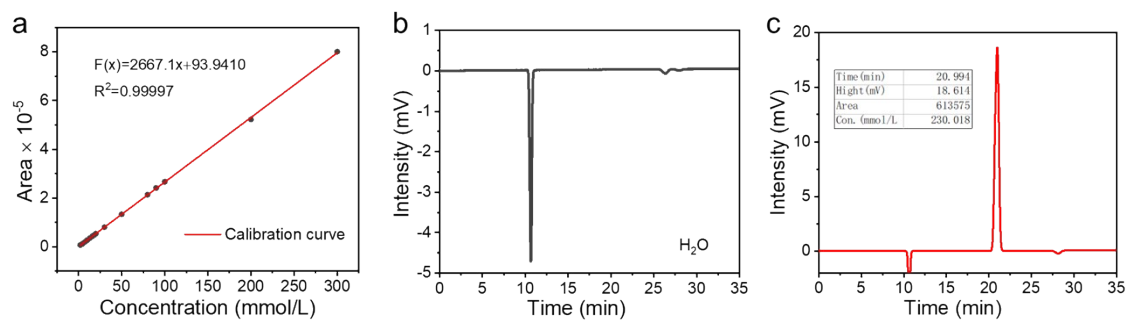

**Figure S10** (a) Calibration curve between HCOOH concentration and relative peak area vs H<sub>2</sub>O using in the high-performance liquid chromatography (HPLC). The linear correlation coefficient is 0.99997. (b) The original chromatographic column curve of H<sub>2</sub>O sample. (c) The curve of catholyte detected by the inspection detector on HPLC was collected from the stability test of Cu-BiOON<sub>4</sub> at 2.35 V for 4h in the solid electrolyte device.

**Table S1** Elemental content of samples obtained from XPS.

| Electrocatalyst       | N (at. %) | O (at. %) | Bi (at. %) | Cu (at. %) |
|-----------------------|-----------|-----------|------------|------------|
| Cu-BiOON <sub>4</sub> | 10.0      | 67.5      | 19.1       | 3.4        |
| BiOON <sub>4</sub>    | 5.5       | 69.6      | 24.9       | --         |
| BiO <sub>x</sub>      | --        | 68.7      | 31.3       | --         |

**Table S2** Comparison of formate production on various Me-Sn bimetallic catalysts under comparable conditions.

| Electrocatalyst                                                | Electrolyte(pH)         | FE <sup>a</sup> (%) | E <sup>b</sup> (V) | E <sup>d</sup> (V) | ref       |
|----------------------------------------------------------------|-------------------------|---------------------|--------------------|--------------------|-----------|
| Bi nanostructure                                               | 0.5M KHCO <sub>3</sub>  | 92                  | -0.9               | -0.9               | 2         |
| Bi nanosheets                                                  | 0.5M NaHCO <sub>3</sub> | 86                  | -1.1               | –                  | 3         |
| Bi dendrites                                                   | 0.5M NaHCO <sub>3</sub> | 98                  | -0.82              | -0.72 to -0.92     | 4         |
| Bismuthene NA                                                  | 0.5M KHCO <sub>3</sub>  | 95                  | -0.88              | -0.75 to -0.95     | 5         |
| Bi <sub>2</sub> S <sub>3</sub> -Bi <sub>2</sub> O <sub>3</sub> | 0.1M KHCO <sub>3</sub>  | 93.8                | -1.1               | -1.0 to -1.4       | 6         |
| Bi-Cu                                                          | 0.5M KHCO <sub>3</sub>  | 95.8                | -0.9               | -0.9 to -1.0       | 7         |
| In <sub>16</sub> Bi <sub>84</sub> NS                           | 0.5M NaHCO <sub>3</sub> | ~100                | -0.94              | -0.84 to -1.54     | 8         |
| CuBi <sub>2</sub> O <sub>4</sub>                               | 0.5M NaHCO <sub>3</sub> | 95                  | -0.93              | -0.83 to -1.03     | 9         |
| Bi <sub>2</sub> CO <sub>3</sub> NS                             | 0.1M KHCO <sub>3</sub>  | 92                  | -1.2               | -1.1 to -1.2       | 10        |
| CuBi <sub>75</sub>                                             | 0.5M KHCO <sub>3</sub>  | ~100                | -0.77              | -0.57 to -1.47     | 11        |
| Cu <sub>1</sub> Sn <sub>1</sub>                                | 0.5M NaHCO <sub>3</sub> | 95.4                | -1.2               | -1.2 to -1.3       | 12        |
| BiCu/CF-0.1                                                    | 0.5 M KHCO <sub>3</sub> | 94.2                | -0.8               | -0.7 to -1.1       | 13        |
| Bi–Cu (2:1)                                                    | 0.1M KHCO <sub>3</sub>  | 94.1                | -1.0               | -0.8 to -1.2       | 14        |
| Cu-BiOON <sub>4</sub>                                          | 0.1M KHCO <sub>3</sub>  | ~100                | -0.6               | -0.5 to -1.2       | This work |

<sup>a</sup>Maximum  $FE_{\text{HCOOH}}$  under the reported conditions. <sup>b</sup>Overpotential at which the maximum FE is achieved. <sup>c</sup>Current density achieved at the listed overpotential. <sup>d</sup>The potential window of faradaic efficiency (>90%) toward formate.

**Table S3** Summary of Sn-based electrocatalyst performance for the reduction of CO<sub>2</sub>

| Electrocatalyst                                                | Electrolyte                              | FE <sup>a</sup> (%) | E <sup>b</sup> (V) | j  <sup>c</sup> (mA cm <sup>-2</sup> ) | EE(%) | ref       |
|----------------------------------------------------------------|------------------------------------------|---------------------|--------------------|----------------------------------------|-------|-----------|
| Ultra-small SnO <sub>2</sub> nanoparticles                     | 1M KHCO <sub>3</sub>                     | 64                  | -1.21              | 145                                    | 27.0  | 15        |
|                                                                | 1M KOH                                   | 46                  | -0.9               | 147                                    | 22.2  |           |
| Sn                                                             | KHCO <sub>3</sub> and KOH mixed solution | 90                  | -1.57              | 200                                    | 33.1  | 16        |
| Bi <sub>2</sub> S <sub>3</sub> -Bi <sub>2</sub> O <sub>3</sub> | 1M KOH                                   | 95.3                | -1.0               | 145                                    | 61.1  | 6         |
| Bi dendrites                                                   | 0.5M KHCO <sub>3</sub>                   | 92                  | -0.82              | 95                                     | 64.2  | 4         |
| Bi/Bi(Sn)O <sub>x</sub> NWs                                    | 1M KOH                                   | ~100                | -0.7               | 100                                    | 74.1  | 17        |
|                                                                |                                          | 85                  | -1.0               | 301                                    | 54.5  |           |
| Bi <sub>2</sub> O <sub>3</sub> @C/HB                           | 1M KOH                                   | 94                  | -1.5               | 285                                    | 49.2  | 18        |
| Bi <sub>2</sub> O <sub>3</sub> NTs                             | 1M KOH                                   | 98                  | -0.58              | 205.8                                  | 77.4  | 19        |
| Cu-BiOON <sub>4</sub>                                          | 1M KOH                                   | 96.0                | -1.0               | 220                                    | 61.7  | This work |

to formate in flow cell.

<sup>a</sup>Maximum  $FE_{\text{HCOOH}}$  under the reported conditions. <sup>b</sup>Potential at which the maximum FE is achieved. <sup>c</sup>Partial current density of formate achieved at the listed overpotential.

**Table S4** Summary of the electrocatalyst performance for producing HCOOH in solid electrolyte devices.

| Catalyst                          | Area cm <sup>2</sup> | SEE diameter<br>( $\mu\text{m}$ ) | E (V) | FE<br>(%) | J <br>(mA cm <sup>-2</sup> ) | Yield/Time    | Anode<br>electrolyte               | ref.         |
|-----------------------------------|----------------------|-----------------------------------|-------|-----------|------------------------------|---------------|------------------------------------|--------------|
| 2D-Bi                             | 4                    | 300                               | 3.08  | 93.1      | 32.1                         | 0.112 M/100 H | 0.1 M KOH                          | 20           |
|                                   |                      | 50                                | ~3.0  | 82.7      | 200                          | --            | 0.1 M KOH                          |              |
| In <sub>2</sub> O <sub>3</sub> @C | 4                    | 50                                | 3.6   | ~85       | 30                           | 0.12 M/3 H    | 1 M H <sub>2</sub> SO <sub>4</sub> | 21           |
| Cu-BiOON <sub>4</sub>             | 2.75                 | 300-1000                          | 2.35  | 92.6      | 81                           | 0.19 M/4 H    | 1 M H <sub>2</sub> SO <sub>4</sub> | This<br>work |
|                                   |                      |                                   | 2.45  | 88.5      | 116                          | --            |                                    |              |

---

## Reference

- 1 W. Ma, S. Xie, T. Liu, Q. Fan, J. Ye, F. Sun, Z. Jiang, Q. Zhang, J. Cheng and Y. Wang, *Nat. Catal.*, 2020, **3**, 478–487.
- 2 P. Lu, D. Gao, H. He, Q. Wang, Z. Liu, S. Dipazir, M. Yuan, W. Zu and G. Zhang, *Nanoscale*, 2019, **11**, 7805–7812.
- 3 W. Zhang, Y. Hu, L. Ma, G. Zhu, P. Zhao, X. Xue, R. Chen, S. Yang, J. Ma, J. Liu and Z. Jin, *Nano Energy*, 2018, **53**, 808–816.
- 4 M. Fan, S. Prabhudev, S. Garbarino, J. Qiao, G. A. Botton, D. A. Harrington, A. C. Tavares and D. Guay, *Appl. Catal. B Environ.*, 2020, **274**, 119031.
- 5 J. Fan, X. Zhao, X. Mao, J. Xu, N. Han, H. Yang, B. Pan, Y. Li, L. Wang and Y. Li, *Adv. Mater.*, 2021, **33**, 2100910.
- 6 P. F. Sui, C. Xu, M. N. Zhu, S. Liu, Q. Liu and J. L. Luo, *Small*, 2022, **18**, 2105682.
- 7 L. Peng, Y. Wang, Y. Wang, N. Xu, W. Lou, P. Liu, D. Cai, H. Huang and J. Qiao, *Appl. Catal. B Environ.*, 2021, **288**, 120003.
- 8 D. Tan, W. Lee, Y. E. Kim, Y. N. Ko, M. H. Youn, Y. E. Jeon, J. Hong, J. E. Park, J. Seo, S. K. Jeong, Y. Choi, H. Choi, H. Y. Kim and K. T. Park, *ACS Appl. Mater. Interfaces*, 2022, **14**, 28890–28899.
- 9 L. Jia, H. Yang, J. Deng, J. Chen, Y. Zhou, P. Ding, L. Li, N. Han and Y. Li, *Chin. J. Chem.*, 2019, **37**, 497–500.
- 10 D. Yao, C. Tang, A. Vasileff, X. Zhi, Y. Jiao and S. Z. Qiao, *Angew. Chem. Int. Ed.*, 2021, **60**, 18178–18184.
- 11 Z. Yang, H. Wang, X. Fei, W. Wang, Y. Zhao, X. Wang, X. Tan, Q. Zhao, H. Wang, J. Zhu, L. Zhou, H. Ning and M. Wu, *Appl. Catal. B Environ.*, 2021, **298**, 120571.
- 12 M. Zhang, Z. Zhang, Z. Zhao, H. Huang, D. H. Anjum, D. Wang, J.-h. He and K.-W. Huang, *ACS Catal.*, 2021, **11**, 11103–11108.
- 13 B. Liu, Y. Xie, X. Wang, C. Gao, Z. Chen, J. Wu, H. Meng, Z. Song, S. Du and Z. Ren, *Appl. Catal. B Environ.*, 2022, **301**, 120781.

- 
- 14 M. Wang, S. Liu, B. Chen, F. Tian and C. Peng, *ACS Sustain. Chem. Eng.*, 2022, **10**, 5693–5701.
  - 15 C. Liang, B. Kim, S. Yang, Y. Liu, C. Francisco Woellner, Z. Li, R. Vajtai, W. Yang, J. Wu, P. J. A. Kenis and P. M. Ajayan, *J. Mater. Chem. A*, 2018, **6**, 10313–10319.
  - 16 D. Kopljar, A. Inan, P. Vindayer, N. Wagner and E. Klemm, *J. Appl. Electrochem.*, 2014, **44**, 1107–1116.
  - 17 Y. Zhao, X. Liu, Z. Liu, X. Lin, J. Lan, Y. Zhang, Y. R. Lu, M. Peng, T. S. Chan and Y. Tan, *Nano Lett.*, 2021, **21**, 6907–6913.
  - 18 S. Q. Liu, E. Shahini, M. R. Gao, L. Gong, P. F. Sui, T. Tang, H. Zeng and J. L. Luo, *ACS Nano*, 2021, **15**, 17757–17768.
  - 19 Q. Gong, P. Ding, M. Xu, X. Zhu, M. Wang, J. Deng, Q. Ma, N. Han, Y. Zhu, J. Lu, Z. Feng, Y. Li, W. Zhou and Y. Li, *Nat. Commun.*, 2019, **10**, 2807.
  - 20 C. Xia, P. Zhu, Q. Jiang, Y. Pan, W. Liang, E. Stavitski, H. N. Alshareef and H. Wang, *Nat. Energy*, 2019, **4**, 776-785.
  - 21 Z. Wang, Y. Zhou, D. Liu, R. Qi, C. Xia, M. Li, B. You and B. Y. Xia, *Angew. Chem. Int. Ed.*, 2022, **61**, 202200552.
